# Supplementary material
Source: PubMed Central journal article supplement (PMC2683074)
Supplement: 0900149106_0900149106SI.pdf [file 0900149106_0900149106SI.pdf]

# Supporting Information

Fortin et al. 10.1073/pnas.0900149106

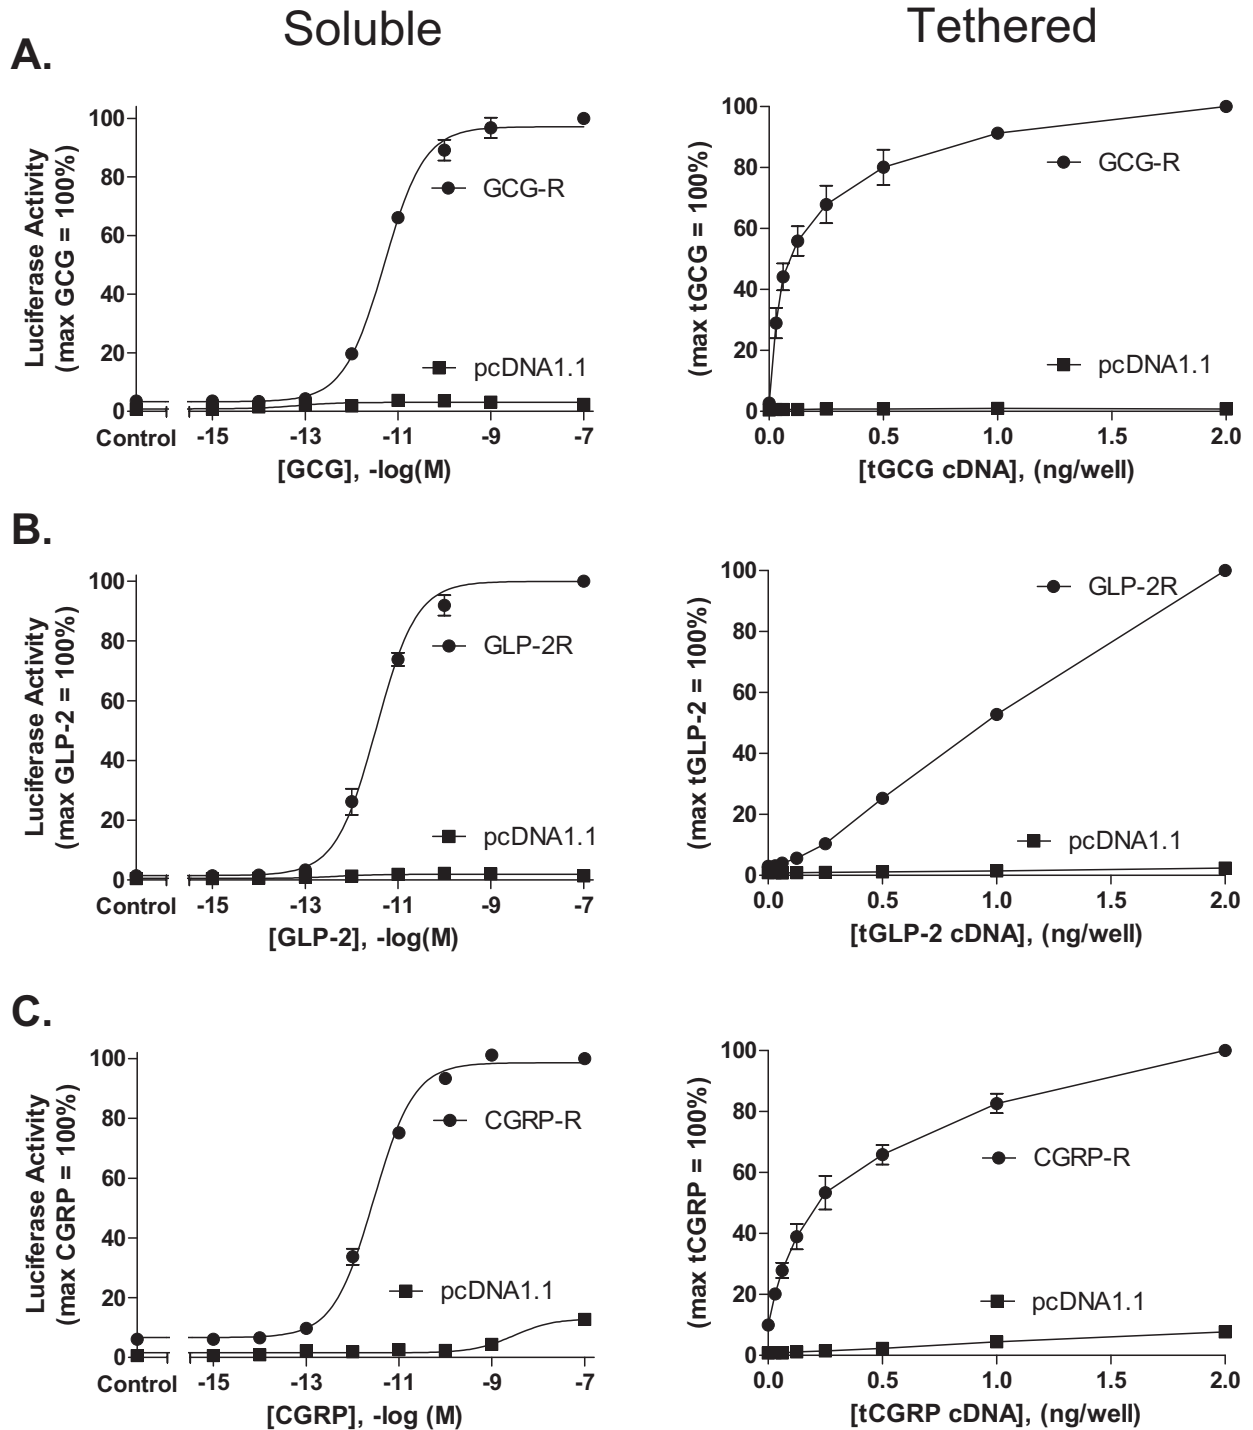

**Fig. S1.** Comparison of soluble versus tethered ligand-induced activation of corresponding GPCRs. Soluble ligand concentration–response (*Left*) and tethered ligand cDNA–activity curves (*Right*) are compared. HEK293 cells expressing receptors (*A*) GCG-R, (*B*) GLP-2R, and (*C*) CGRP-R were stimulated with either soluble or tethered ligands. CGRP-R requires coexpression of the calcitonin-like receptor and RAMP1 [Poyner DR, et al. (2002) *Pharmacol Rev* 54:233–246]. Each graph represents data (mean  $\pm$  SEM) from 3 independent experiments performed in triplicate.
